# Supplementary material for: Design and Optimization of In Situ Gelling Mucoadhesive Eye Drops Containing Dexamethasone
Source: MDPI journal article supplement (doi:10.3390/gels8090561), 2022-09-02
Supplement: s1 [file s1]

Supplementary materials

# Design and Optimization of In Situ Gelling Mucoadhesive Eye Drops Containing Dexamethasone

Boglárka Szalai <sup>1</sup>, Orsolya Jójárt-Laczkovich <sup>1</sup>, Anita Kovács <sup>1</sup>, Szilvia Berkó <sup>1</sup>, György Tibor Balogh <sup>2,3</sup>, Gábor Katona <sup>1</sup> and Mária Budai-Szűcs <sup>1,\*</sup>

<sup>1</sup> Institute of Pharmaceutical Technology and Regulatory Affairs, Faculty of Pharmacy, University of Szeged, Eötvös Str. 6, H-6720 Szeged, Hungary

<sup>2</sup> Department of Pharmacodynamics and Biopharmacy, Faculty of Pharmacy, University of Szeged, Eötvös Str. 6, H-6720 Szeged, Hungary

<sup>3</sup> Department of Chemical and Environmental Process Engineering, Budapest University of Technology and Economics, Műegyetem Quay 3, H-1111 Budapest, Hungary

\* Correspondence: budai-szucs.maria@szte.hu; Tel.: +36-6254-5573

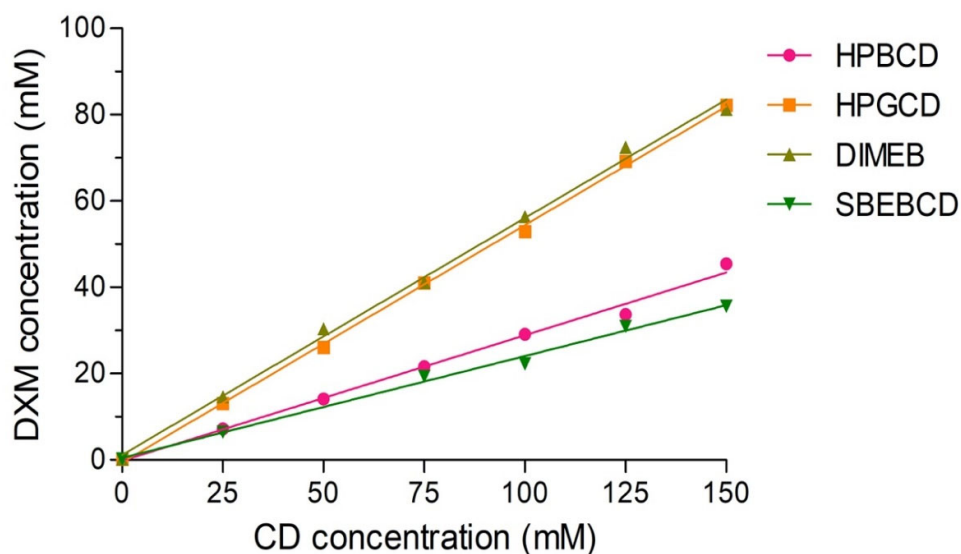

**Figure S1.** Phase solubility curves of the different CD-DXM complexes.

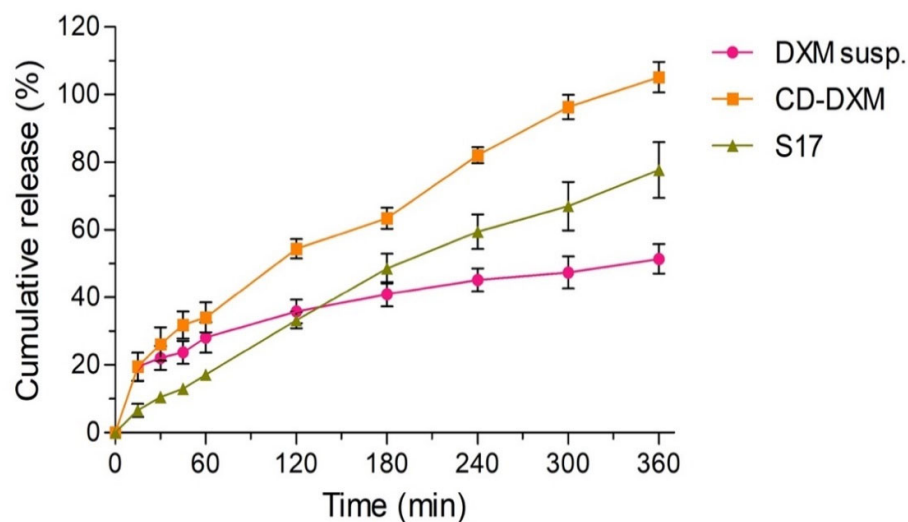

Figure S2. *In vitro* DXM release from suspension, CD solution and complex polymer composition.

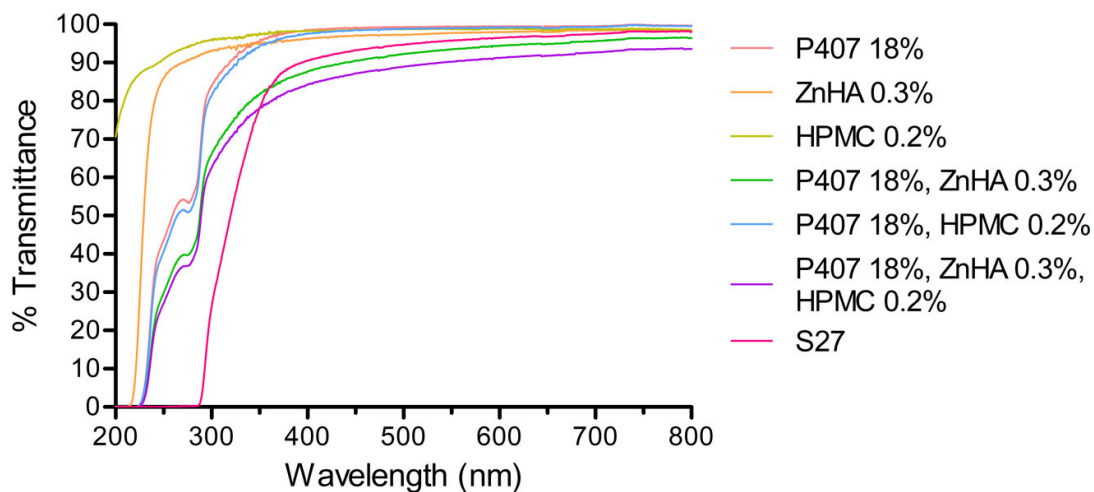

Figure S3. Transmittance of the compositions.
